# Supplementary material
Source: MDPI journal article supplement (https://www.mdpi.com/2227-9040/8/3/73)
Supplement: s1 [file s1]

# Robust and Rapid Detection of Mixed Volatile Organic Compounds in Flow Through Air by A Low Cost Electronic Nose

Jiamei Huang and Jayne Wu \*

Department of Electrical Engineering and Computer Science, University of Tennessee, Knoxville, TN 37996, USA; jhuang37@vols.utk.edu (J.H.)

\* Correspondence: jwu10@utk.edu; Tel.: +1-865-974-6494

Received: 14 July 2020; Accepted: date; Published: date

## 1. Calibration Procedure:

The MOS sensors are calibrated in a sealed chamber to select an appropriate load resistor  $R_0$  to make it sensitive to VOC gas concentrations in the range of 10 ppm–1000 ppm. The concentration of VOC gas ( $C_{VOC}$ ) in the sealed chamber from volatilized liquid sample can be calculated using the following equation:

$$C_{VOC} = \frac{VdRTv\%}{CPM} \quad (1)$$

where  $V$  is the volume of liquid sample ( $\mu\text{L}$ );  $d$  is the density of the liquid solution ( $\text{kg}/\text{m}^3$ );  $R$  is the gas constant ( $R = 8.3145 \text{ J K}^{-1} \text{ mol}^{-1}$ );  $T$  is temperature (K);  $v\%$  is the volume fraction;  $C$  is the volume of the chamber (L);  $P$  is the air pressure (kPa);  $M$  is the molar mass of the VOC gas ( $\text{g}/\text{mol}$ ).

The calibration includes three steps:

- 1.) The sensors with initial load resistors are first connected on a breadboard and were put into a sealed chamber;
- 2.) Certain amounts of solutions (e.g., 0.5  $\mu\text{L}$ –1  $\mu\text{L}$ –5  $\mu\text{L}$ –10  $\mu\text{L}$ ) are added into a 1-L chamber, the gas concentration in the chamber (after several minutes when the liquid sample volatilized) can be calculated by the equation  $C_{VOC} = \frac{VdRTv\%}{CPM}$ ; Voltages are monitored during this process; Load resistor is adjusted to make sure each sensor have a sufficient response to a low concentration and still wouldn't get saturated at a relatively high concentration;
- 3.) The sensors with the selected load resistors are soldered onto a PCB board ready for use.

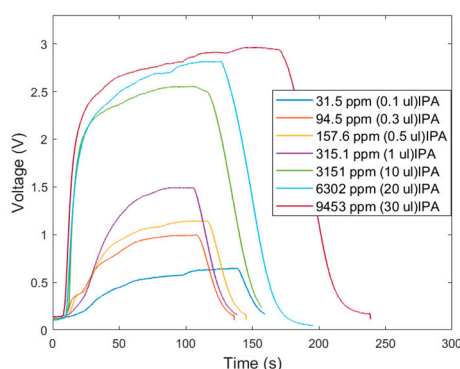

(a)

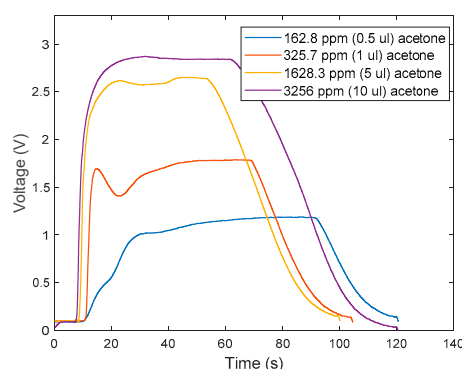

(b)

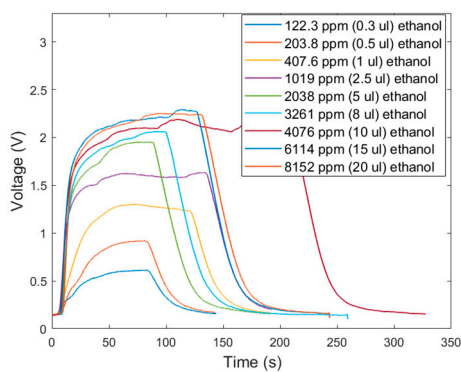

(c)

**Figure S1.** Calibration curves of the sensor TGS 2602 for different concentrations of (a) IPA, (b) acetone and (c) ethanol. The measurement is done in a sealed box at room temperature and  $50 \pm 5\%$  RH.

## 2. Repeatability Test of the Four MOS Sensors over 7 Days:

A set of experiments was conducted to gauge the day-to-day output variations of the four sensors chosen for this work. They are tested with 10 mL ethanol in a closed box once per day for 7 days. The outputs can be seen in Figure S2.

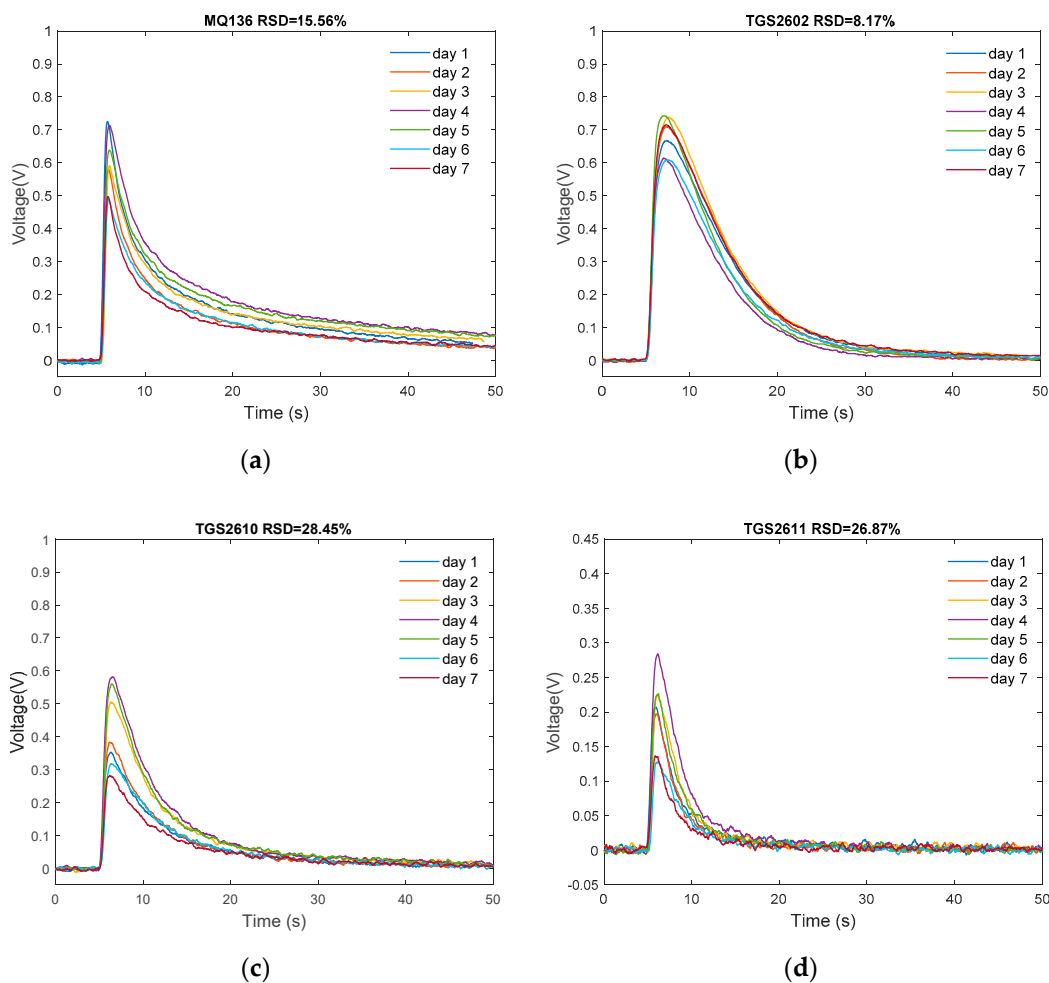

**Figure S2.** Output curves of (a) MQ 136, (b) TGS 2602, (c) TGS 2610 and (d) TGS 2611 over a period of 7 days.
